# Supplementary material
Source: PubMed Central journal article supplement (PMC2714724)

## Supplementary Figure 1

Immunofluorescence of HeLa cells expressing wild-type and mutant Uromodulin, costained for Uromodulin and LAMP-1. UV microscopy of transfected cells fixed at 10 hours post-transfection and stained for Uromodulin (green) and LAMP-1 (red). Scale bars = 10 $\mu$ m; insets are magnified by ~1.5X. **(A)** wild-type Uromodulin **(B)** mutant C32W Uromodulin **(C)** mutant C126R Uromodulin **(D)** mutant C223R Uromodulin **(E)** mutant G488R Uromodulin. Wild-type and mutant Uromodulins did not colocalise with LAMP-1, thereby indicating an absence of these forms of Uromodulin in lysosomes. Mutant N128S Uromodulin and D196N Uromodulin showed identical patterns to the other mutant Uromodulins (data not shown).

# Supplementary Figure 1

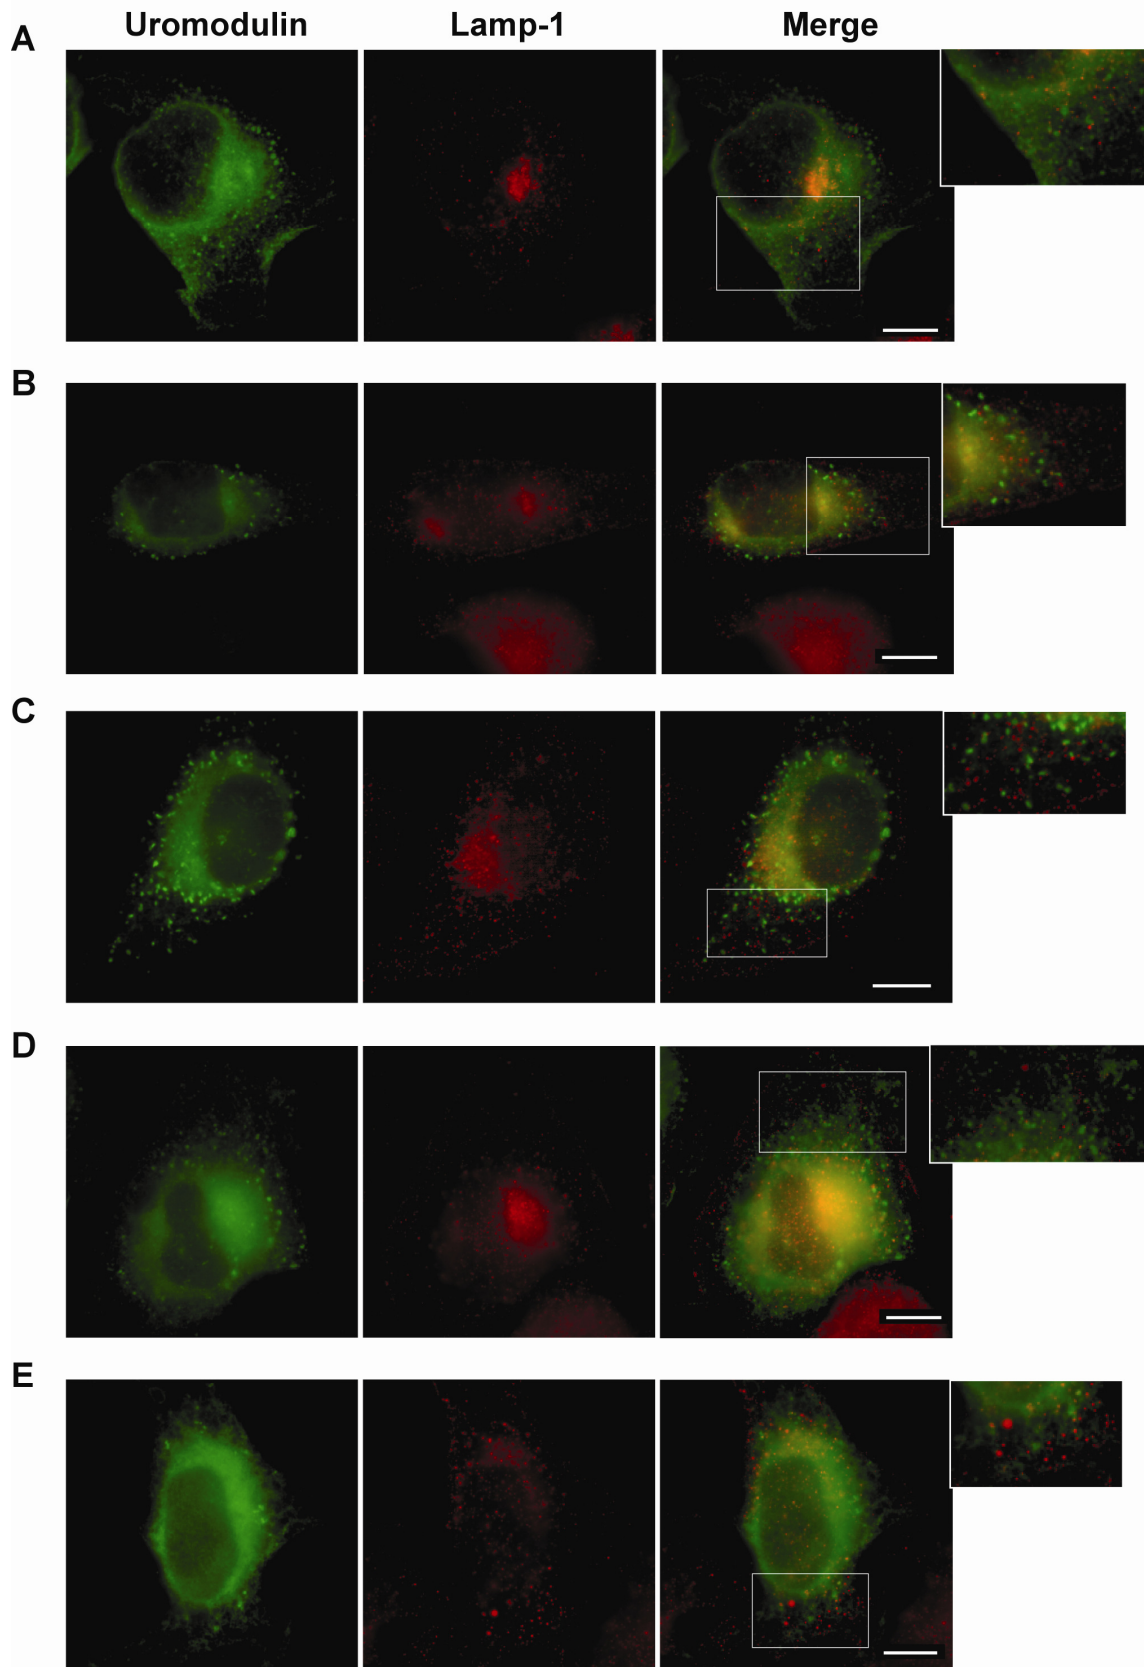

Supplement: ddp235_1.pdf [file ddp235_1.pdf]
